# Supplementary material for: Luminescence properties of La2W2−xMoxO9 (x = 0–2):Eu3+ materials and their Judd–Ofelt analysis: novel red line emitting phosphors for pcLEDs
Source: Royal Society of Chemistry journal article supplement (doi:10.1039/c6qm00118a), 2016-09-15
Supplement: c6qm00118a1.pdf [file c6qm00118a1.pdf]

## Electronic supplementary information

### Luminescence Properties of $\text{La}_2\text{W}_{2-x}\text{Mo}_x\text{O}_9$ ( $x = 0 - 2$ ): $\text{Eu}^{3+}$ and their Judd–Ofelt analysis: A Novel red line emitting phosphors for pcLEDs

Kasturi .S and Sivakumar .V\*

Department of Chemistry, National Institute of Technology, Rourkela 769 008, India.

Fig S1. The variation of electric dipole emission intensity of  $\text{Eu}^{3+}$  vs x value (increase of Mo concentration)

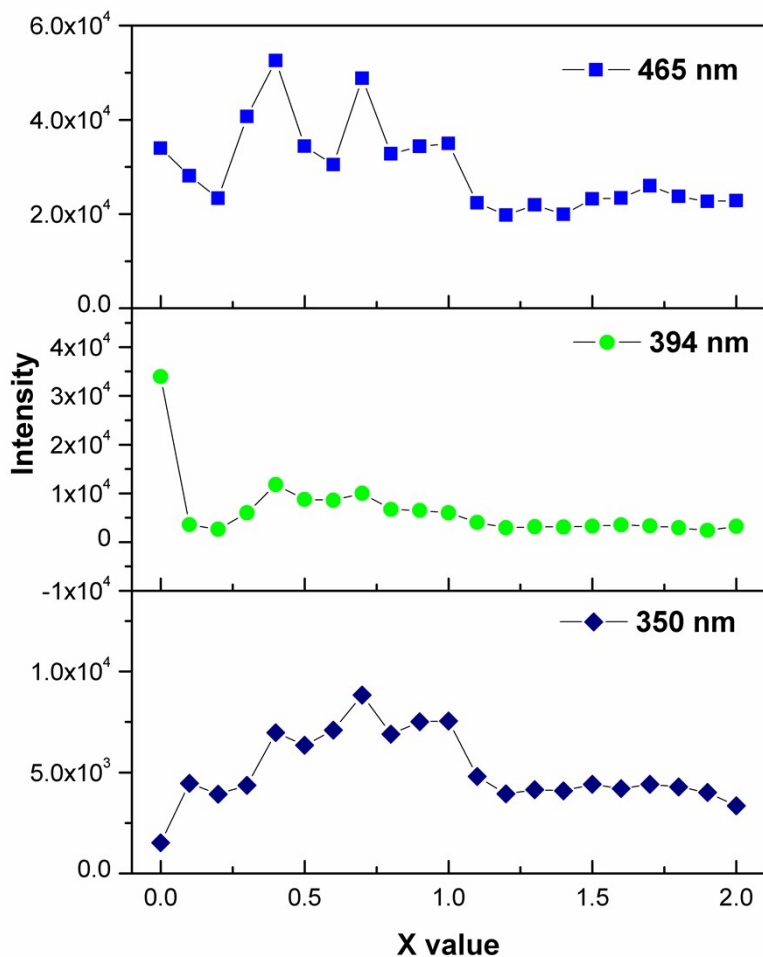

Table.ST1. Comparison of emission intensity ( $^5D_0 \rightarrow ^7F_2$ ) of the  $\text{La}_{0.95}\text{Eu}_{0.05}\text{W}_{2-x}\text{Mo}_x\text{O}_9$  (  $x = 0 - 2$  instep of 0.1 )

| Compositions                                                                                        | Relative Intensity (a.u)                |                                         | CIE chromaticity coordinates            |               |
|-----------------------------------------------------------------------------------------------------|-----------------------------------------|-----------------------------------------|-----------------------------------------|---------------|
|                                                                                                     | $\lambda_{\text{exc}} = 394 \text{ nm}$ | $\lambda_{\text{exc}} = 465 \text{ nm}$ |                                         |               |
| $\text{Y}_2\text{O}_2\text{S}:\text{Eu}^{3+}$ (Nichia)                                              | 1                                       | 1                                       | $\lambda_{\text{exc}} = 465 \text{ nm}$ |               |
| $\text{La}_{0.95}\text{Eu}_{0.05}\text{W}_{2-x}\text{Mo}_x\text{O}_9$ ( $x = 0 - 2$ instep of 0.1 ) |                                         |                                         | x                                       | y             |
| <b>0</b>                                                                                            | <b>0.54</b>                             | 3.18                                    | 0.6490                                  | 0.3487        |
| 0.1                                                                                                 | 0.08                                    | 2.64                                    | 0.6472                                  | 0.3503        |
| 0.2                                                                                                 | 0.05                                    | 2.18                                    | 0.6478                                  | 0.3498        |
| 0.3                                                                                                 | 0.13                                    | 3.80                                    | 0.6468                                  | 0.3507        |
| <b>0.4</b>                                                                                          | 0.24                                    | <b>4.92</b>                             | <b>0.6482</b>                           | <b>0.3495</b> |
| 0.5                                                                                                 | 0.18                                    | 3.21                                    | 0.6480                                  | 0.3497        |
| 0.6                                                                                                 | 0.18                                    | 2.84                                    | 0.6491                                  | 0.3488        |
| 0.7                                                                                                 | 0.2                                     | 4.6                                     | 0.6476                                  | 0.3501        |
| 0.8                                                                                                 | 0.14                                    | 3.06                                    | 0.6469                                  | 0.3508        |
| 0.9                                                                                                 | 0.13                                    | 3.21                                    | 0.6455                                  | 0.3521        |
| 1                                                                                                   | 0.12                                    | 3.27                                    | 0.6469                                  | 0.3538        |
| 1.1                                                                                                 | 0.08                                    | 2.10                                    | 0.6432                                  | 0.3537        |
| 1.2                                                                                                 | 0.06                                    | 1.84                                    | 0.6491                                  | 0.3486        |
| 1.4                                                                                                 | 0.06                                    | 1.86                                    | 0.6516                                  | 0.3565        |
| 1.5                                                                                                 | 0.07                                    | 2.17                                    | 0.6468                                  | 0.3505        |
| 1.6                                                                                                 | 0.07                                    | 2.18                                    | 0.6454                                  | 0.3518        |
| 1.7                                                                                                 | 0.07                                    | 2.43                                    | 0.6511                                  | 0.3469        |
| 1.8                                                                                                 | 0.07                                    | 2.22                                    | 0.6458                                  | 0.3515        |

|     |      |      |        |        |
|-----|------|------|--------|--------|
| 1.9 | 0.06 | 2.12 | 0.6461 | 0.3512 |
| 2   | 0.07 | 2.13 | 0.6469 | 0.350  |

Table. ST2. Comparison of emission intensity ( ${}^5D_0 - {}^7F_2$ ) of the  $La_{2-y}Eu_yW_{1.6}Mo_{0.4}O_9$  ( $y = 0 - 2$  instep of 0.2)

| Compositions                                                     | Relative Intensity (a.u)    |                             | CIE chromaticity coordinates |        | Asymmetric ratio<br>${}^5D_0 - {}^7F_2 / {}^5D_0 - {}^7F_1$ |
|------------------------------------------------------------------|-----------------------------|-----------------------------|------------------------------|--------|-------------------------------------------------------------|
|                                                                  | $\lambda_{exc} = 394$<br>nm | $\lambda_{exc} = 465$<br>nm |                              |        |                                                             |
| $Y_2O_3S:Eu^{3+}$ (Nichia)                                       | 1                           | 1                           | $\lambda_{exc} = 465$ nm     |        |                                                             |
| $La_{2-y}Eu_yW_{1.6}Mo_{0.4}O_9$<br>( $y = 0 - 2$ instep of 0.2) |                             |                             | x                            | y      |                                                             |
| 0.05                                                             | 0.24                        | 4.92                        |                              |        |                                                             |
| 0.2                                                              | 0.16                        | 2.42                        | 0.668                        | 0.3318 | 5.4                                                         |
| 0.4                                                              | 0.48                        | 4.92                        | 0.668                        | 0.3317 | 5.8                                                         |
| 0.6                                                              | 0.63                        | 6.04                        | 0.6688                       | 0.331  | 5.8                                                         |
| 0.8                                                              | 1.34                        | 7.96                        | 0.6688                       | 0.3309 | 5.9                                                         |
| 1                                                                | 1                           | 7.54                        | 0.6691                       | 0.3307 | 6.0                                                         |
| 1.2                                                              | 0.71                        | 6.60                        | 0.6692                       | 0.3305 | 6.2                                                         |
| <b>1.4</b>                                                       | <b>1.26</b>                 | <b>8.24</b>                 | 0.6704                       | 0.3294 | 6.5                                                         |
| 1.6                                                              | 1.54                        | 7.61                        | 0.6713                       | 0.3285 | 6.6                                                         |
| <b>1.8</b>                                                       | <b>1.71</b>                 | <b>6.63</b>                 | 0.6725                       | 0.3273 | 6.9                                                         |
| 2                                                                | 1.32                        | 4.47                        | 0.6724                       | 0.3274 | 7.0                                                         |
